# Supplementary material
Source: publisher figshare collection journal article supplement (https://karger.figshare.com/ndownloader/files/21078231)
Supplement: Supplementary file 1 [file 21078231]

| **Supplementary Table 2S**. Overview of theoretical combinations of maternal/fetal genotypes. | | | | | | | | | | |
| --- | --- | --- | --- | --- | --- | --- | --- | --- | --- | --- |
| Maternal serotype | Maternal genotype | Possible fetal genotypes | | | | | | | | |
| A1 | A1A1 | A1A1 | A1A2 | A1**B** | A1O1 | A1O2 |  |  |  |  |
| A1 | A1O1 | A1A1 | A1A2 | A1**B** | A1O1 | A1O2 | O1A2 | O1**B** | O1O1 | O1O2 |
| A1 | A1O2 | A1A1 | A1A2 | A1**B** | A1O1 | A1O2 | O2A2 | O2**B** | O2O1 | O2O2 |
| A1, A2 | A1A2 | A1A1 | A1A2 | A1**B** | A1O1 | A1O2 | A2A2 | A2**B** | A2O1 | A2O2 |
| A1, B | A1B | A1A1 | A1A2 | A1B | A1O1 | A1O2 | BB | BA2 | BO1 | BO2 |
| A2 | A2A2 | A2A1 | A2A2 | A2**B** | A2O1 | A2O2 |  |  |  |  |
| A2 | A2O1 | A2A1 | A2A2 | A2**B** | A2O1 | A2O2 | O1A1 | O1**B** | O1O1 | O1O2 |
| A2 | A2O2 | A2A1 | A2A2 | A2**B** | A2O1 | A2O2 | O2A1 | O2**B** | O2O1 | O2O2 |
| A2, B | A2B | A2A1 | A2A2 | A2B | A2O1 | A2O2 | BB | BA1 | BO1 | BO2 |
| B | BB | BB | B**A1** | B**A2** | BO1 | BO2 |  |  |  |  |
| B | BO1 | BB | BA1 | B**A2** | BO1 | BO2 | O1A1 | O1**A2** | O1O1 | O1O2 |
| B | BO2 | BB | B**A1** | B**A2** | BO1 | BO2 | O2**A1** | O2**A2** | O2O1 | O2O2 |
| O | O1O1 | O1**A1** | O1**A2** | O1**B** | O1O1 | O1O2 |  |  |  |  |
| O | O1O2 | O1A1 | O1**A2** | O1**B** | O1O1 | O1O2 | O2A1 | O2**A2** | O2**B** | O2O2 |
| O | O2O2 | O2**A1** | O2**A2** | O2**B** | O2O1 | O2O2 |  |  |  |  |

Predictable, relevant fetal antigens are presented in bold, assuming specific A2 primer set is added to the assay. Some combinations of ABO genotypes make prediction of fetal ABO type impossible in the current assay; in combinations shown on grey background, the A1 cannot be identified or ruled out. In the most relevant clinical situation with homozygous ABO*O.01 mothers, as highlighted with frame, the assay can predict the fetal ABO type. Table only valid for non-egg donation situations.
